# Supplementary material for: MSM HIV testing following an online testing intervention in China
Source: PubMed Central journal article supplement (PMC5477382; doi:10.1186/s12879-017-2546-y), 2017-06-19

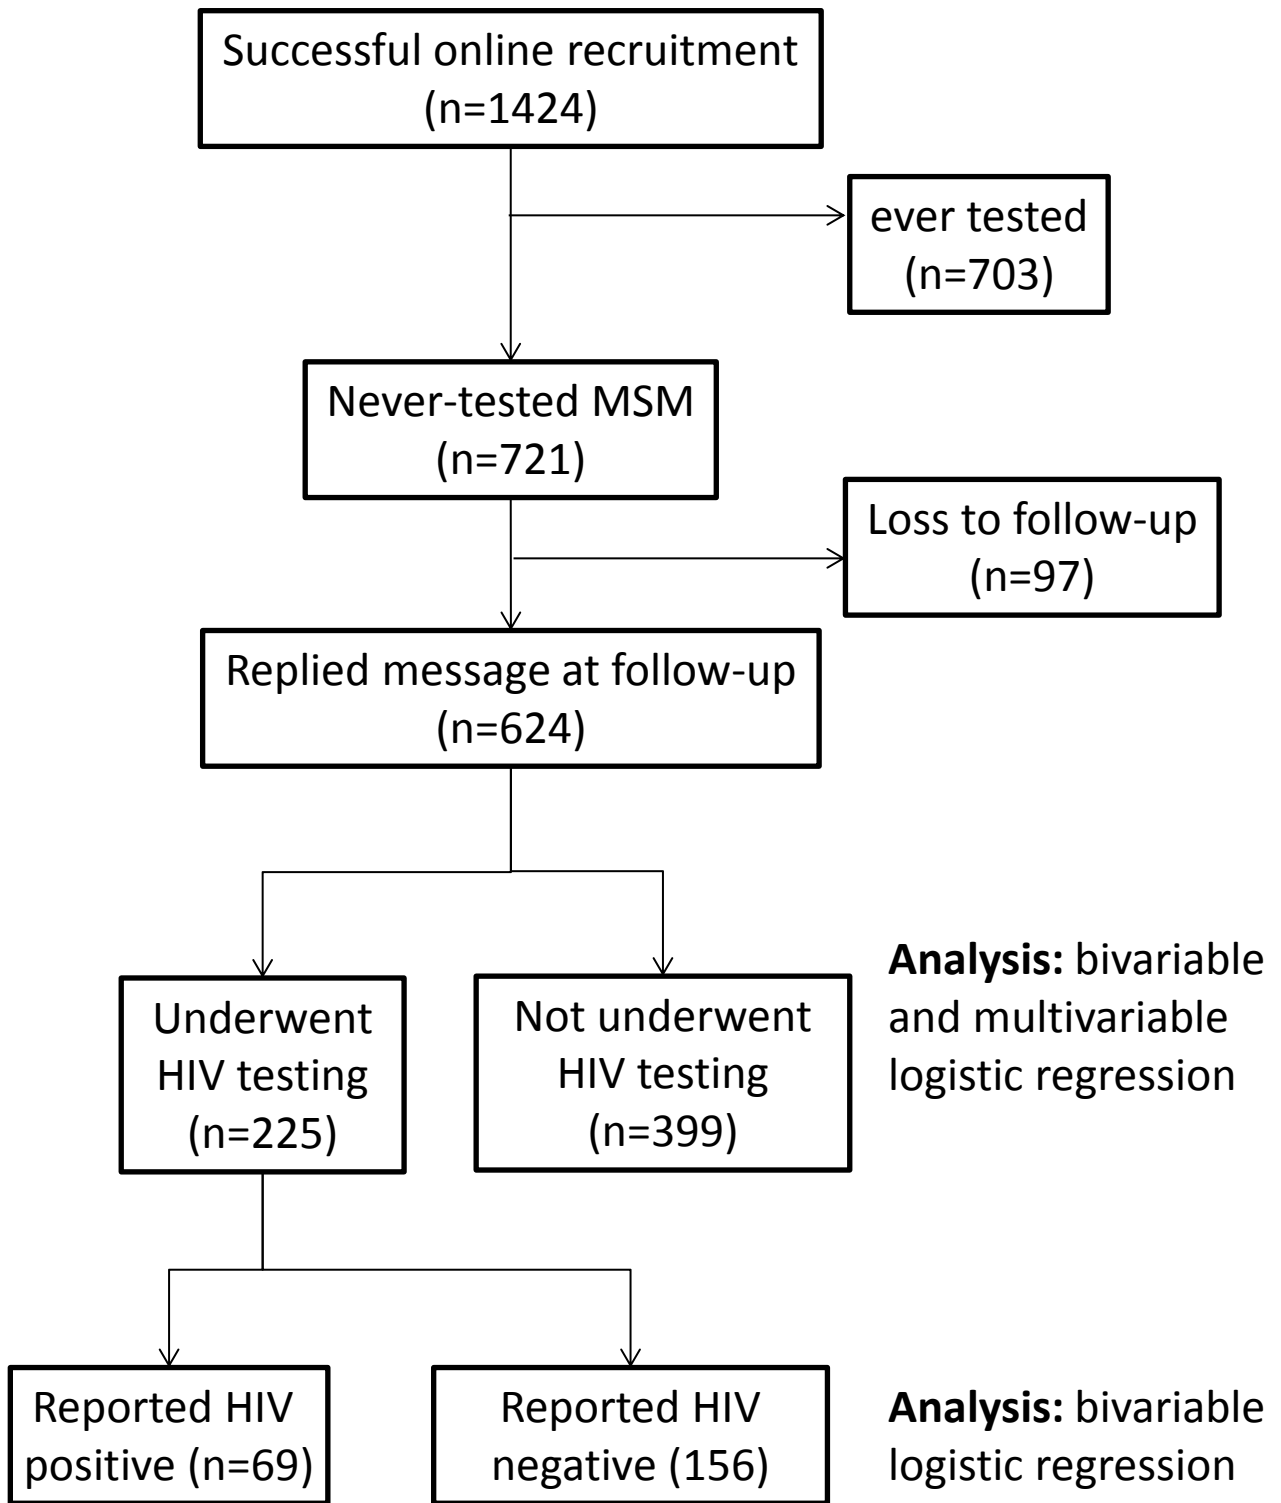

Supplement: 12879_2017_2546_MOESM1_ESM.pdf [file 12879_2017_2546_MOESM1_ESM.pdf]
